# Supplementary material
Source: Springer Nature journal article supplement (https://www.springermedizin.de/resource/supplementary/12884_2010_394_MOESM3_ESM.pdf/9457606)

female household head

education

insurance

region

urban

wealth

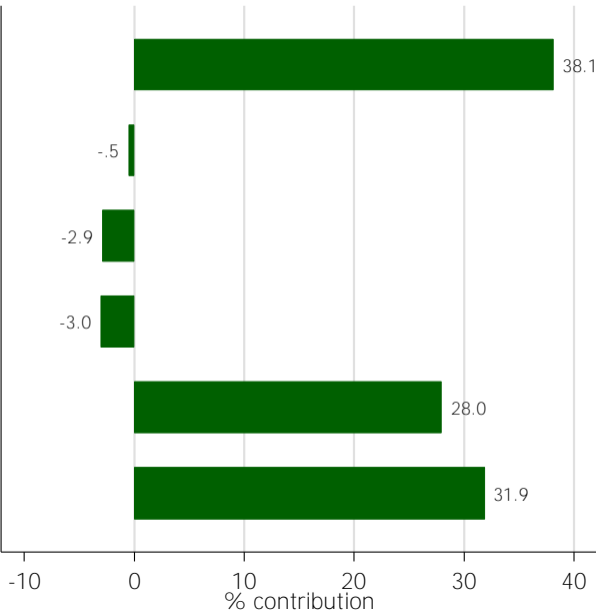

Supplement: MOESM3 [file 9457606]
